# Supplementary material for: Achiral phosphonium induced remarkable circular polarized luminescence in a chiral cadmium(ii) halide perovskite material
Source: Royal Society of Chemistry journal article supplement (doi:10.1039/d3cc02666c), 2023-01-01
Supplement: d3cc02666c1.pdf [file d3cc02666c1.pdf]

## Achiral Phosphonium Induced Remarkable Circular Polarized Luminescence in Chiral Cadmium (II) Halide Perovskite Material

Shubhankar Barman,<sup>a</sup> Priya Ranjan,<sup>a</sup> Anuja Datta<sup>a,b,\*</sup>

<sup>a</sup>School of Applied and Interdisciplinary Sciences, Indian Association for the Cultivation of Science, 2A and 2B Raja S. C. Mullick Road, Jadavpur, Kolkata 700 032, India.

<sup>b</sup>Technical Research Center, Indian Association for the Cultivation of Science, 2A and 2B Raja S. C. Mullick Road, Jadavpur, Kolkata 700 032, India.

\*Corresponding Author: E-mail: [psuad4@iacs.res.in](mailto:psuad4@iacs.res.in)

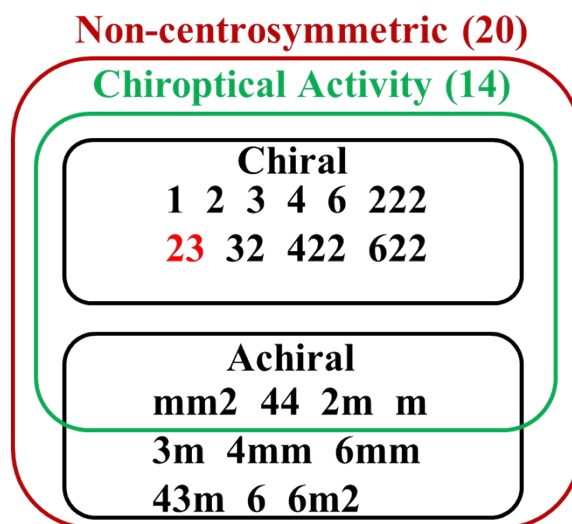

**Scheme S1.** Relationship between point group and chiroptical active materials. The PCC single-crystal belongs to non-centrosymmetric chiral **23 (198)** point group.

### Synthesis procedure:

**Chemicals:** Methyltriphenylphosphonium chloride, Cadmium (II) chloride and 37% Hydrochloric acid were purchased from Sigma-Aldrich, Thermo-Fisher, and Merck. All chemicals were used without further purification.

**Method:** Single crystals of  $(\text{MePh}_3\text{P})_2\text{CdCl}_4$  (PCC) were synthesized by the room temperature slow solvent evaporation method.  $\text{MePh}_3\text{P}\text{Cl}$  (1mmol, 312.77mg) and  $\text{CdCl}_2$  (1mmol, 183.32mg) in equal proportions were dissolved separately in a 10mL HCl (37%) and two solutions were stirred at room temperature for 30 minutes. Next,  $\text{MePh}_3\text{P}\text{Cl}$  solution was added slowly (drop by drop) in  $\text{CdCl}_2$  solution under continuous magnetic stirring further 1h at room

temperature and was filtered through a thick pad of celite. A clean transparent solution was kept for crystallisation at room temperature. After 7 days, white transparent single crystals were formed. **Yield:** 76% **Melting point:** 130°C – 150°C. **<sup>31</sup>P NMR (162 MHz, CD<sub>3</sub>OD):**  $\delta$  21.2

### **Crystallography:**

The single-crystal X-ray diffraction data for PCC at 163K were obtained on a Bruker Smart Apex Duo diffractometer using Mo K $\alpha$  radiation ( $\lambda = 0.71073$  Å). Crystal structures were solved using the direct method and then refined by full-matrix least-squares against F<sup>2</sup> using SHELXL-2014/7 built in the Apex 3 program and Olex2 software package.<sup>1,2,3</sup> All of the non-hydrogen atoms were refined anisotropically. All hydrogen atoms were fixed in geometric positions to their parent atoms using riding model.<sup>4</sup> The X-ray crystallographic structures have been deposited at the Cambridge Crystallographic Data Centre (CCDC 2233871) and can be obtained free of charge from the CCDC via <https://www.ccdc.cam.ac.uk/structures/>.

### **Preparation of chiral perovskite films:**

The film of PCC is fabricated by drop-casting method with quartz glass as substrate. Substrate with 6mm  $\times$  6mm dimension is washed in an ultrasonic cleaner using D.I. water, ethanol and acetone in sequence for 15 minutes each. Next, the substrate surface is dried in vacuum for 2hr. The precursor solution for the PCC is prepared by dissolving the PCC microcrystals in THF (1mmol/ml). To form the films 100 $\mu$ L of the precursor solution is spread on the quartz substrate and finally the as-fabricated film is annealed at 50°C for 30minutes on a hot-plate. The resulting 90 $\mu$ m thickness film was used for UV-VIS, PL, CD, and CPL measurements.

### **Physical properties measurements:**

Powder XRD of PCC is measured on a Rigaku Smartlab, Hypix-3000, with CuK $\alpha$  radiation,  $\lambda=1.5406$ Å. The diffraction data were collected in the 2 $\theta$  range 8-60° with step size 0.001°. The experimental PXRD data match fairly well with Stimulated data based on Single crystal XRD, which confirmed the pure phase of PCC (See Fig. S1). The UV-Vis absorptions in the solid-state are measured at room temperature on Optical properties were studied by a UV-Vis spectrophotometer (Agilent 8453) at rt. TGA is recorded on a Netzsch STA449C thermal analyser in the temperature range of 25°C– 600°C and recorded at heating rate of 10 K.min<sup>-1</sup>. Differential scanning calorimetry (DSC) was conducted by using TA instruments (DSC Q2000). Solid-State photoluminescence (PL) spectrum was measured using a Horiba JobinYvon Fluoromax-4 spectrofluorometer.

**Solid-state circular dichroism (CD) measurement:** Thin film sample of PCC was used for CD measurement. Solid-state circular dichroism (CD) measurement was measured on JASCO J-810 circular dichroism spectrophotometer

**Solid-state CPL measurement:**

For Circularly polarized luminescence (CPL) measurements, thin film of PCC was used, film preparation as discussed earlier. The CPL-300 setup with a double prism linearly polarizing monochromator to avoid linear polarization effects, and the resultant CPL signal is free from undesired linear dichroism signals. CPL was measured by using the difference between left and right circularly polarized light intensities emitted by the sample, which was carried out with the JASCO Spectral Manager Suite supplied with the instrument. During the measurement time, digital integration time (D.I.T) was kept fixed at 4.0 sec with multiple spectral accumulations (3) at a scanning speed of  $50\text{nm}\cdot\text{min}^{-1}$  to avoid noise. Sample was excited at 440nm, similar to that of fluorescence experiment and excitation/emission slit widths were maintained at 2000nm each and the instrument was calibrated with standard d-and l-camphor solutions in ethanol ( $0.4\%\text{WV}^{-1}$ ) prior to recording samples

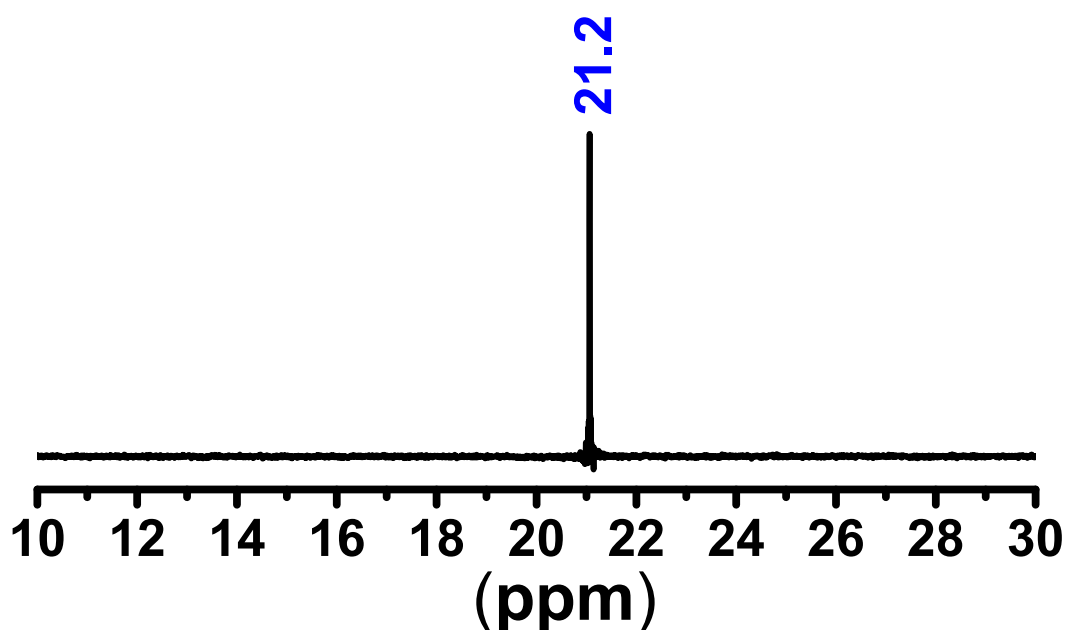

**Figure S1.**  $^{31}\text{P}$  NMR spectrum of PCC at room temperature.

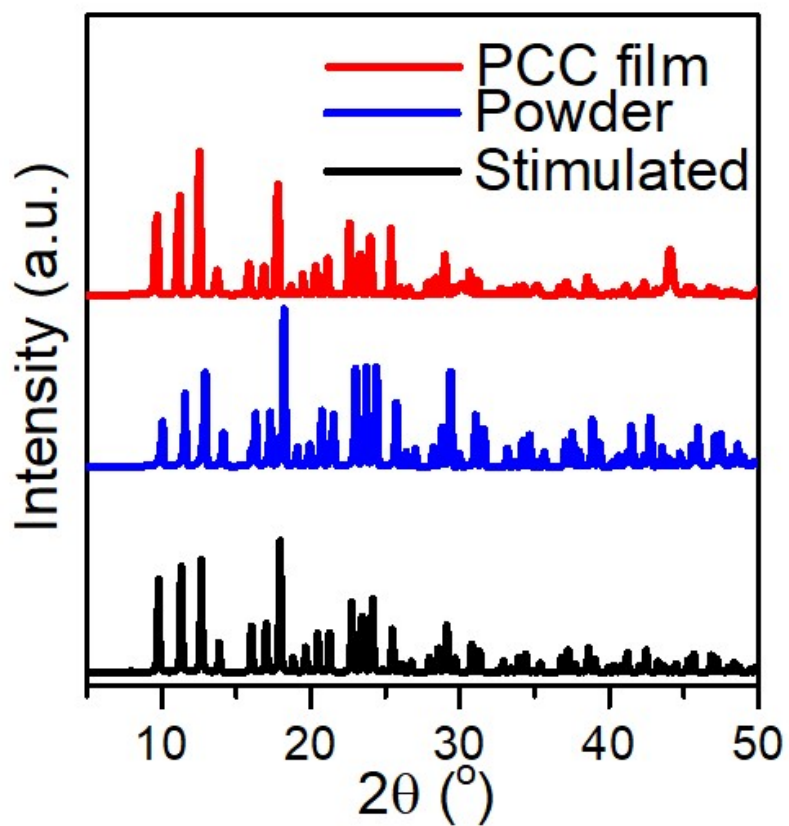

**Figure S2.** X-Ray diffraction patterns of PCC thin film on quartz glass, powder, and simulated. Film and powder samples are measured at room temperature, and match well with the

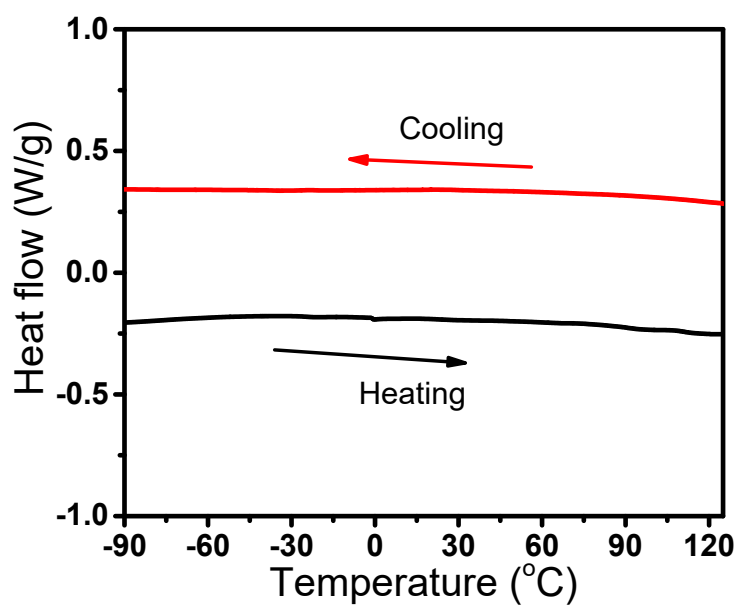

simulated XRD pattern.

**Figure S3.** Heating cooling DSC curves of PCC compound in powder form. No exothermic and endothermic peaks were observed from -90°C to 125°C.

**Table 1** Crystal data and structure refinement for PCC.

|                                             |                                                                  |        |
|---------------------------------------------|------------------------------------------------------------------|--------|
| Identification code                         | PCC                                                              |        |
| Empirical formula                           | C <sub>38</sub> H <sub>36</sub> CdCl <sub>4</sub> P <sub>2</sub> |        |
| Formula weight                              |                                                                  | 808.81 |
| Temperature/K                               |                                                                  | 163.15 |
| Crystal system                              | cubic                                                            |        |
| Space group                                 | P2 <sub>1</sub> 3                                                |        |
| a/Å                                         | 15.560(15)                                                       |        |
| b/Å                                         | 15.560(15)                                                       |        |
| c/Å                                         | 15.560(15)                                                       |        |
| α/°                                         |                                                                  | 90     |
| β/°                                         |                                                                  | 90     |
| γ/°                                         |                                                                  | 90     |
| Volume/Å <sup>3</sup>                       | 3767(11)                                                         |        |
| Z                                           |                                                                  | 4      |
| ρ <sub>calc</sub> /cm <sup>3</sup>          |                                                                  | 1.426  |
| μ/mm <sup>-1</sup>                          |                                                                  | 0.974  |
| F(000)                                      |                                                                  | 1640   |
| Crystal size/mm <sup>3</sup>                | 0.3 × 0.1 × 0.1                                                  |        |
| Radiation                                   | MoKα (λ = 0.71073)                                               |        |
| 2θ range for data collection/°              | 6.414 to 50.898                                                  |        |
| Index ranges                                | -18 ≤ h ≤ 18, -18 ≤ k ≤ 18, -18 ≤ l ≤ 17                         |        |
| Reflections collected                       |                                                                  | 41861  |
| Independent reflections                     | 2329 [R <sub>int</sub> = 0.0320, R <sub>sigma</sub> = 0.0121]    |        |
| Data/restraints/parameters                  | 2329/0/137                                                       |        |
| Goodness-of-fit on F <sup>2</sup>           |                                                                  | 1.13   |
| Final R indexes [I ≥ 2σ (I)]                | R <sub>1</sub> = 0.0207, wR <sub>2</sub> = 0.0584                |        |
| Final R indexes [all data]                  | R <sub>1</sub> = 0.0217, wR <sub>2</sub> = 0.0593                |        |
| Largest diff. peak/hole / e Å <sup>-3</sup> | 0.92/-0.20                                                       |        |
| Flack parameter                             | -0.02(3)                                                         |        |

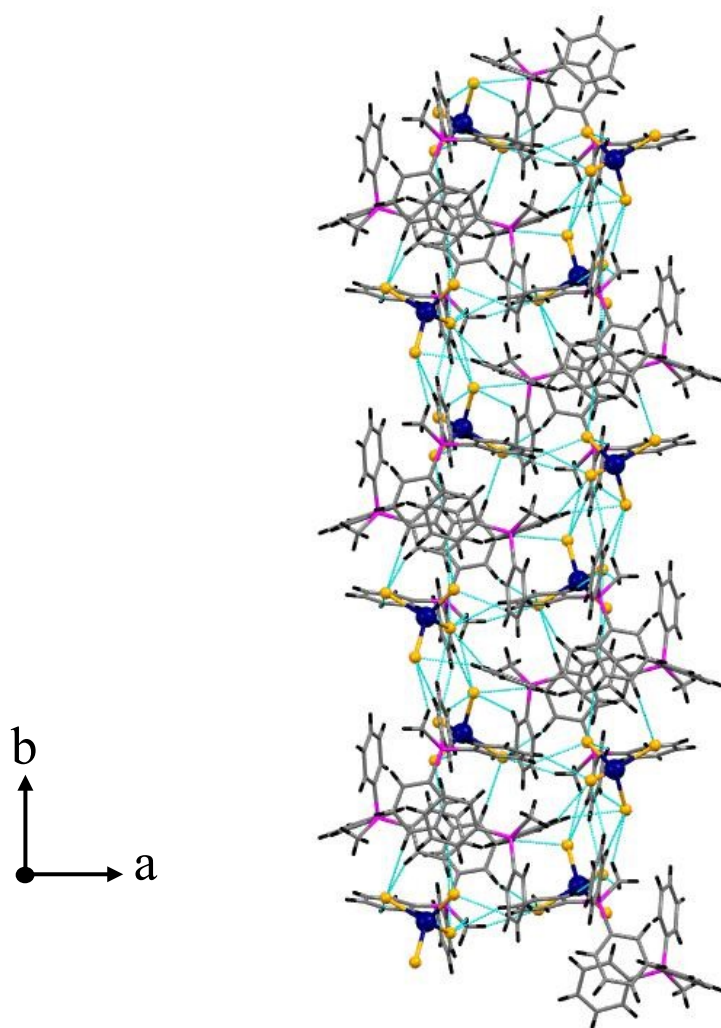

**Figure S4.** Cd-Cl bond distances and Cd-Cl...H hydrogen bond configuration of PCC.

| PCC          | Bond lengths |
|--------------|--------------|
| Cd (1)-Cl(1) | 2.430(2)     |
| Cd (1)-Cl(2) | 2.461(2)     |
| Cd (1)-Cl(2) | 2.461(2)     |
| Cd (1)-Cl(2) | 2.461(2)     |

**Table S2.** Selected Cd-Cl bond lengths for PCC

**Table S3.** Selected Cd-Cl...H bond lengths for PCC

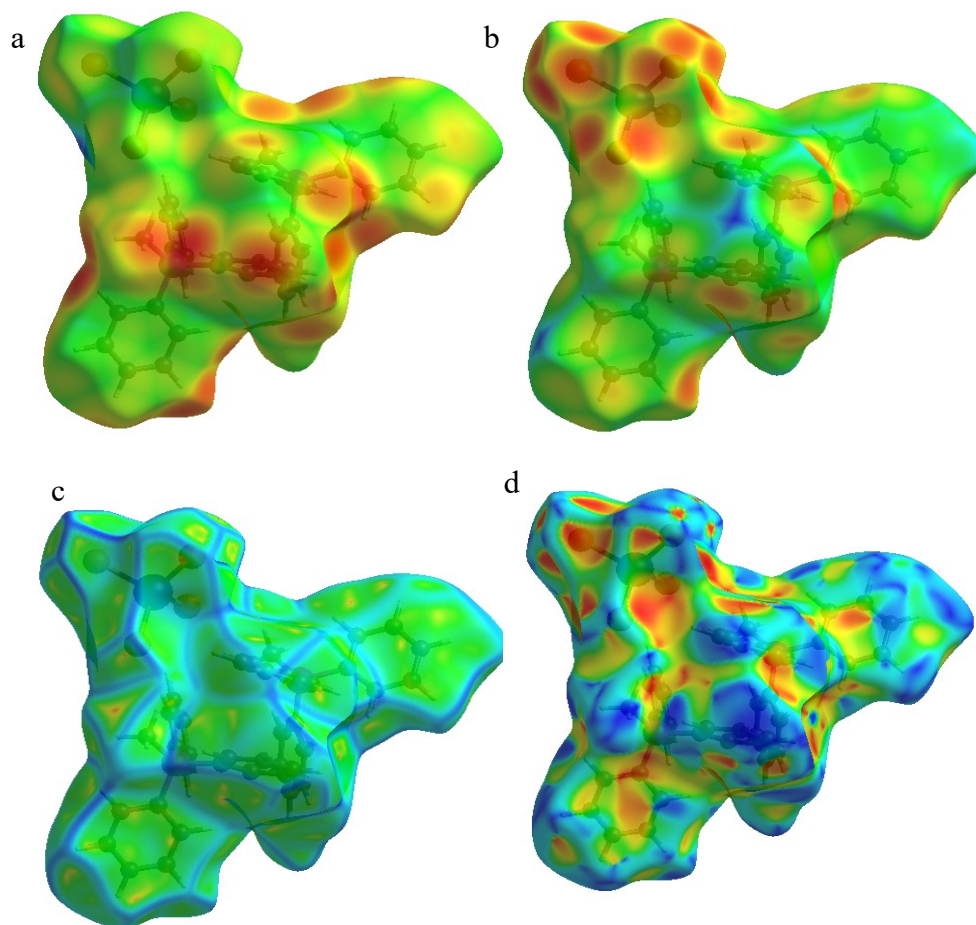

| PCC         | Bond lengths |
|-------------|--------------|
| Cl(2)⋯H(10) | 2.935        |
| Cl(2)⋯H(2)  | 2.694        |
| Cl(2)⋯H(9)  | 2.832        |
| Cl(2)⋯H(3)  | 2.871        |
| Cl(2)⋯H(7)  | 2.94         |

**Figure S5.** Hirshfeld surface analysis of PCC using 3D color mapping showing (a) di, (b) de,

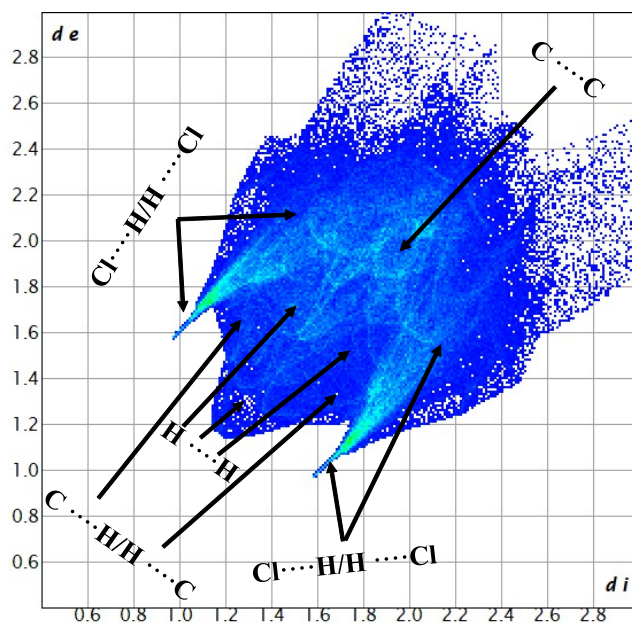

(c) curvedness, (d) shape index.

**Figure S6.** 2D fingerprint (de vs di) plot of PCC showing all the possible interactions in the molecule.

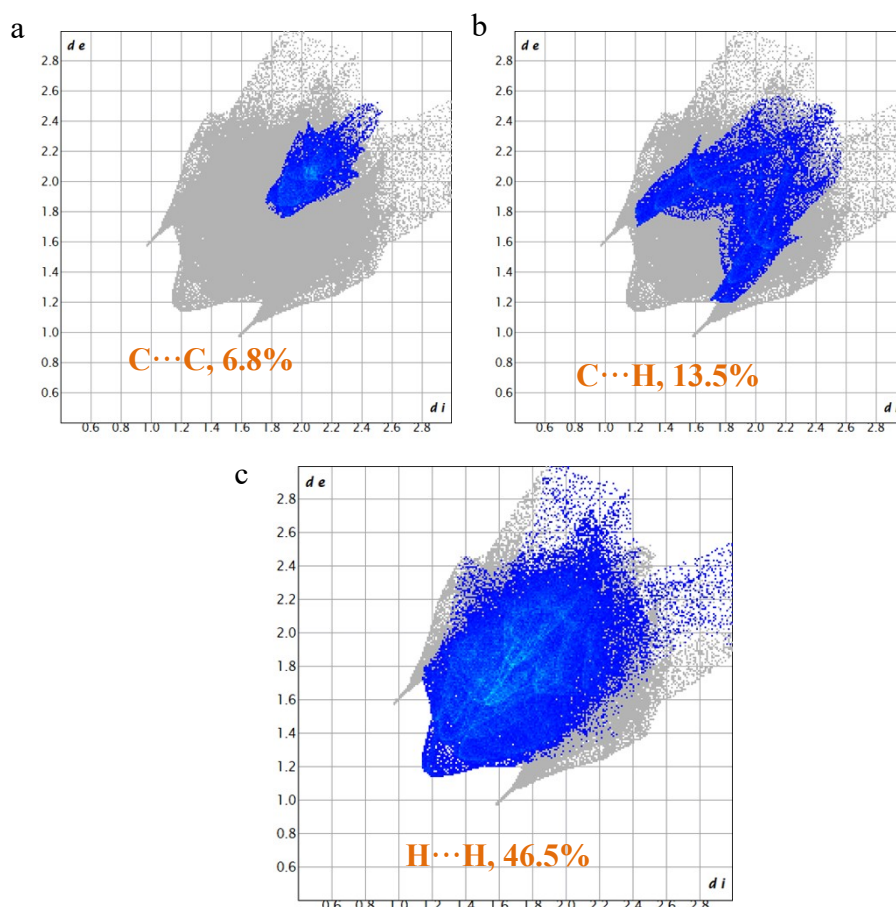

**Figure S7.** 2D fingerprint (de vs di) plot of PCC showing the percentages of (a) C $\cdots$ C, (b) C $\cdots$ H, (c) H $\cdots$ H interactions in the molecule.

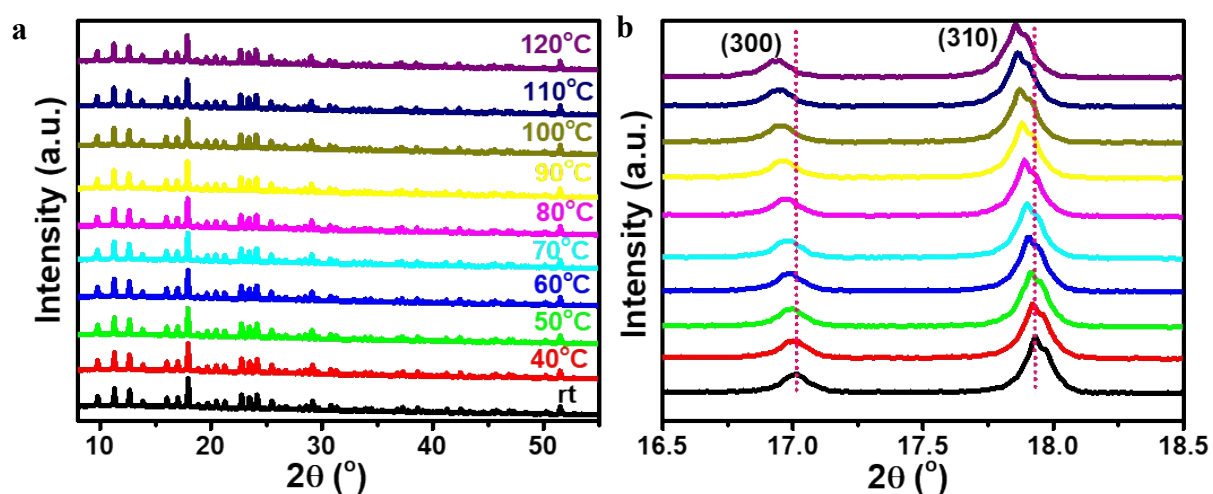

**Fig. S8.** (a, b) Temperature dependent powder XRD pattern of PCC compound.

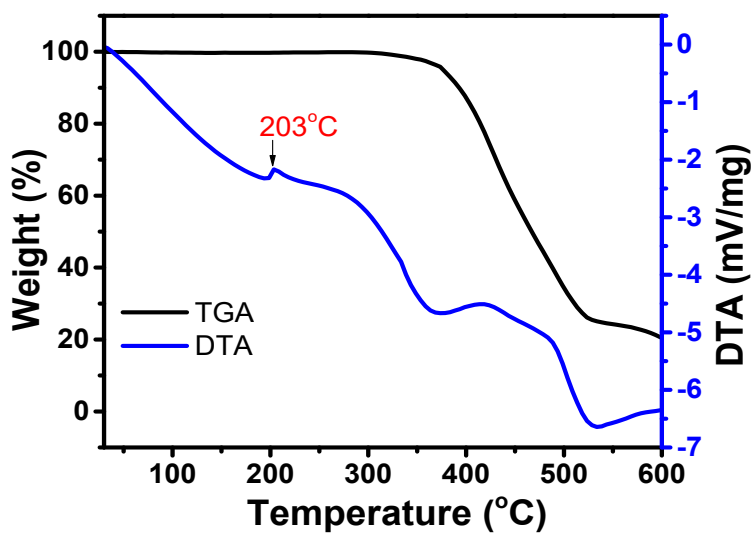

**Figure S9.** DTA and TGA curve of PCC compound. The result shows that PCC has a high thermal stability up to 140°C.

**Table S4.** Hirshfeld surface analysis of PCC single crystal.

| Surface property  | Range<br>(Minimum/maximum) | Globularity<br>and<br>Asphericity | Surface volume ( $\text{\AA}^3$ )<br>and Area ( $\text{\AA}^2$ ) |
|-------------------|----------------------------|-----------------------------------|------------------------------------------------------------------|
| $d_i$             | 0.9793 / 3.4443            |                                   |                                                                  |
| $d_e$             | 0.9791 / 3.0720            |                                   |                                                                  |
| $d_{\text{norm}}$ | -0.1935 / 2.2577           | 0.724 and 0.054                   | 930.45 and 636.34                                                |
| Shape index       | -0.9987 / 0.9975           |                                   |                                                                  |
| Curvedness        | -3.7585 / 0.4871           |                                   |                                                                  |

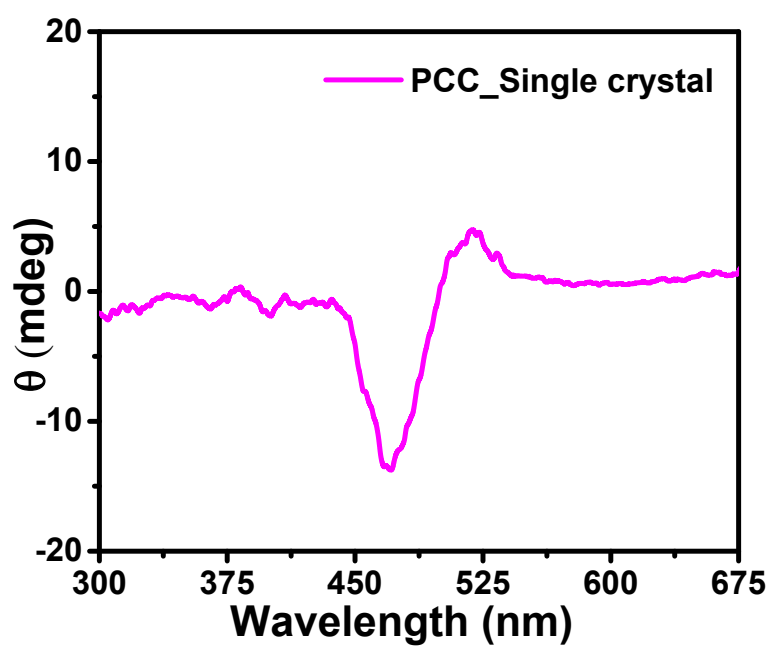

**Figure S10.** Circularly Dichroism (CD) spectrum of PCC single crystal at room temperature.

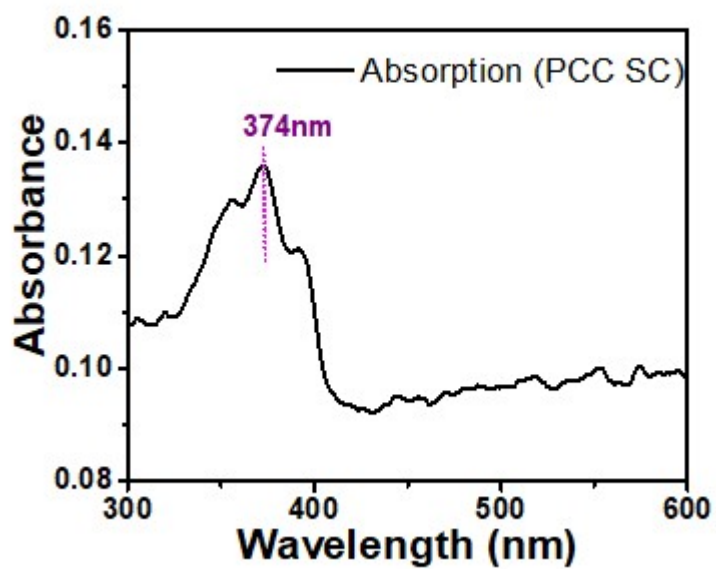

**Figure S11.** UV-Vis absorption spectrum of PCC single crystal shows that absorption near visible region, as compared to visible emission from PCC film.

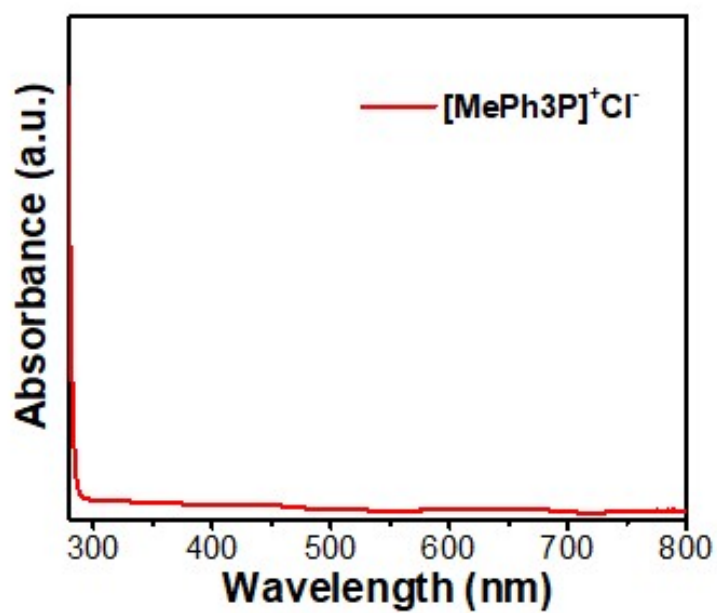

**Figure S12.** Solid state absorption spectrum of  $[\text{MePh}_3\text{P}]\text{Cl}$  at room temperature.

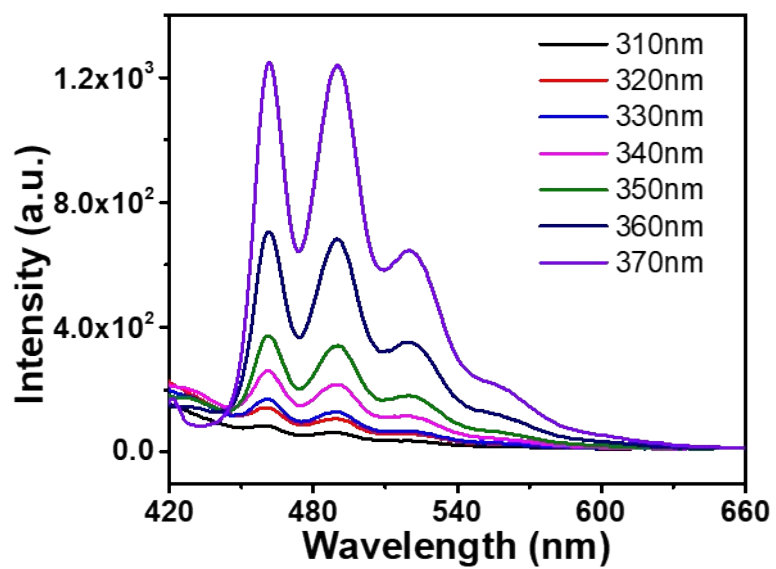

**Figure S13.** Excitation wavelength dependent emission spectra of PCC film at room temperature.

**Table S5.** Different bond angles in PCC system

| Number | Atom1 | Atom2 | Atom3 | Angle    |
|--------|-------|-------|-------|----------|
| 1      | C1    | P1    | C7    | 109.9(1) |
| 2      | C1    | P1    | C1    | 109.0(1) |
| 3      | C1    | P1    | C1    | 109.0(1) |
| 4      | C7    | P1    | C1    | 109.9(1) |
| 5      | C7    | P1    | C1    | 109.9(1) |
| 6      | C1    | P1    | C1    | 109.0(1) |
| 7      | H2    | C2    | C1    | 120.3    |
| 8      | H2    | C2    | C3    | 120.2    |
| 9      | C1    | C2    | C3    | 119.5(4) |
| 10     | P1    | C1    | C2    | 120.1(3) |
| 11     | P1    | C1    | C6    | 121.0(3) |
| 12     | C2    | C1    | C6    | 118.7(3) |
| 13     | P1    | C7    | H7    | 109.3    |
| 14     | P1    | C7    | H7    | 109.3    |
| 15     | P1    | C7    | H7    | 109.3    |
| 16     | H7    | C7    | H7    | 109.7    |
| 17     | H7    | C7    | H7    | 109.7    |
| 18     | H7    | C7    | H7    | 109.7    |
| 19     | C1    | C6    | H6    | 119.8    |
| 20     | C1    | C6    | C5    | 120.4(4) |
| 21     | H6    | C6    | C5    | 119.8    |
| 22     | H4    | C4    | C3    | 120      |
| 23     | H4    | C4    | C5    | 119.7    |
| 24     | C3    | C4    | C5    | 120.3(5) |
| 25     | C2    | C3    | C4    | 120.6(5) |
| 26     | C2    | C3    | H3    | 119.8    |
| 27     | C4    | C3    | H3    | 119.6    |
| 28     | C6    | C5    | C4    | 120.4(4) |
| 29     | C6    | C5    | H5    | 119.6    |
| 30     | C4    | C5    | H5    | 119.9    |
| 31     | H2    | C2    | C1    | 120.3    |
| 32     | H2    | C2    | C3    | 120.2    |
| 33     | C1    | C2    | C3    | 119.5(4) |
| 34     | P1    | C1    | C2    | 120.1(3) |
| 35     | P1    | C1    | C6    | 121.0(3) |
| 36     | C2    | C1    | C6    | 118.7(3) |
| 37     | C1    | C6    | H6    | 119.8    |
| 38     | C1    | C6    | C5    | 120.4(4) |
| 39     | H6    | C6    | C5    | 119.8    |
| 40     | H4    | C4    | C3    | 120      |
| 41     | H4    | C4    | C5    | 119.7    |
| 42     | C3    | C4    | C5    | 120.3(5) |

|    |     |     |     |          |
|----|-----|-----|-----|----------|
| 43 | C2  | C3  | C4  | 120.6(5) |
| 44 | C2  | C3  | H3  | 119.8    |
| 45 | C4  | C3  | H3  | 119.6    |
| 46 | C6  | C5  | C4  | 120.4(4) |
| 47 | C6  | C5  | H5  | 119.6    |
| 48 | C4  | C5  | H5  | 119.9    |
| 49 | H2  | C2  | C1  | 120.3    |
| 50 | H2  | C2  | C3  | 120.2    |
| 51 | C1  | C2  | C3  | 119.5(4) |
| 52 | P1  | C1  | C2  | 120.1(3) |
| 53 | P1  | C1  | C6  | 121.0(3) |
| 54 | C2  | C1  | C6  | 118.7(3) |
| 55 | C1  | C6  | H6  | 119.8    |
| 56 | C1  | C6  | C5  | 120.4(4) |
| 57 | H6  | C6  | C5  | 119.8    |
| 58 | H4  | C4  | C3  | 120      |
| 59 | H4  | C4  | C5  | 119.7    |
| 60 | C3  | C4  | C5  | 120.3(5) |
| 61 | C2  | C3  | C4  | 120.6(5) |
| 62 | C2  | C3  | H3  | 119.8    |
| 63 | C4  | C3  | H3  | 119.6    |
| 64 | C6  | C5  | C4  | 120.4(4) |
| 65 | C6  | C5  | H5  | 119.6    |
| 66 | C4  | C5  | H5  | 119.9    |
| 67 | C14 | P2  | C8  | 109.4(1) |
| 68 | C14 | P2  | C8  | 109.4(1) |
| 69 | C14 | P2  | C8  | 109.4(1) |
| 70 | C8  | P2  | C8  | 109.5(1) |
| 71 | C8  | P2  | C8  | 109.5(1) |
| 72 | C8  | P2  | C8  | 109.5(1) |
| 73 | P2  | C14 | H14 | 109.4    |
| 74 | P2  | C14 | H14 | 109.4    |
| 75 | P2  | C14 | H14 | 109.4    |
| 76 | H14 | C14 | H14 | 109.5    |
| 77 | H14 | C14 | H14 | 109.5    |
| 78 | H14 | C14 | H14 | 109.5    |
| 79 | H9  | C9  | C8  | 120      |
| 80 | H9  | C9  | C10 | 120.1    |
| 81 | C8  | C9  | C10 | 119.8(4) |
| 82 | P2  | C8  | C9  | 121.2(3) |
| 83 | P2  | C8  | C13 | 119.8(3) |
| 84 | C9  | C8  | C13 | 118.9(3) |
| 85 | C8  | C13 | H13 | 119.9    |
| 86 | C8  | C13 | C12 | 120.1(3) |
| 87 | H13 | C13 | C12 | 119.9    |
| 88 | C9  | C10 | H10 | 119.5    |
| 89 | C9  | C10 | C11 | 120.8(5) |
| 90 | H10 | C10 | C11 | 119.7    |

---

|     |     |     |     |           |
|-----|-----|-----|-----|-----------|
| 91  | C10 | C11 | H11 | 120       |
| 92  | C10 | C11 | C12 | 120.0(5)  |
| 93  | H11 | C11 | C12 | 120       |
| 94  | C13 | C12 | C11 | 120.2(4)  |
| 95  | C13 | C12 | H12 | 119.9     |
| 96  | C11 | C12 | H12 | 119.9     |
| 97  | H9  | C9  | C8  | 120       |
| 98  | H9  | C9  | C10 | 120.1     |
| 99  | C8  | C9  | C10 | 119.8(4)  |
| 100 | P2  | C8  | C9  | 121.2(3)  |
| 101 | P2  | C8  | C13 | 119.8(3)  |
| 102 | C9  | C8  | C13 | 118.9(3)  |
| 103 | C8  | C13 | H13 | 119.9     |
| 104 | C8  | C13 | C12 | 120.1(3)  |
| 105 | H13 | C13 | C12 | 119.9     |
| 106 | C9  | C10 | H10 | 119.5     |
| 107 | C9  | C10 | C11 | 120.8(5)  |
| 108 | H10 | C10 | C11 | 119.7     |
| 109 | C10 | C11 | H11 | 120       |
| 110 | C10 | C11 | C12 | 120.0(5)  |
| 111 | H11 | C11 | C12 | 120       |
| 112 | C13 | C12 | C11 | 120.2(4)  |
| 113 | C13 | C12 | H12 | 119.9     |
| 114 | C11 | C12 | H12 | 119.9     |
| 115 | H9  | C9  | C8  | 120       |
| 116 | H9  | C9  | C10 | 120.1     |
| 117 | C8  | C9  | C10 | 119.8(4)  |
| 118 | P2  | C8  | C9  | 121.2(3)  |
| 119 | P2  | C8  | C13 | 119.8(3)  |
| 120 | C9  | C8  | C13 | 118.9(3)  |
| 121 | C8  | C13 | H13 | 119.9     |
| 122 | C8  | C13 | C12 | 120.1(3)  |
| 123 | H13 | C13 | C12 | 119.9     |
| 124 | C9  | C10 | H10 | 119.5     |
| 125 | C9  | C10 | C11 | 120.8(5)  |
| 126 | H10 | C10 | C11 | 119.7     |
| 127 | C10 | C11 | H11 | 120       |
| 128 | C10 | C11 | C12 | 120.0(5)  |
| 129 | H11 | C11 | C12 | 120       |
| 130 | C13 | C12 | C11 | 120.2(4)  |
| 131 | C13 | C12 | H12 | 119.9     |
| 132 | C11 | C12 | H12 | 119.9     |
| 133 | Cl2 | Cd1 | Cl1 | 109.25(3) |
| 134 | Cl2 | Cd1 | Cl2 | 109.69(3) |
| 135 | Cl2 | Cd1 | Cl2 | 109.69(3) |
| 136 | Cl1 | Cd1 | Cl2 | 109.25(3) |
| 137 | Cl1 | Cd1 | Cl2 | 109.25(3) |
| 138 | Cl2 | Cd1 | Cl2 | 109.69(3) |

---

**Table S6.** Summarized  $|g_{CD}|$  and  $|g_{lum}|$  values for other metal halide chiral materials.

| Compounds                                                 | Dimension | $ g_{CD} $        | $ g_{lum} $      | Source of Chirality                                       | Ref. |
|-----------------------------------------------------------|-----------|-------------------|------------------|-----------------------------------------------------------|------|
| R-<br>$Cu_2I_2(BINAP)_2$ <sup>a)</sup>                    | 0D        | -                 | 0.005            | Chiral chelating ligand                                   | 5    |
| S- $Cu_2I_2(BINAP)_2$                                     | 0D        | -                 | 0.005            | Chiral chelating ligand                                   | 5    |
| inorganic<br>perovskite<br>nanoplatelets<br>(NPLs)        | -         | 0.0008            | 0.0023           | Chiral organic cation                                     | 6    |
| $CsPbBr_3$                                                | -         | 0.0062            | 0.006            | Inorganic silica right<br>(or left) handed<br>nanohelices | 7    |
| (R/ S-MBA) $SbI_4$ <sup>b)</sup>                          | 1D        | 0.02              | Inactive         | Chiral organic cation                                     | 8    |
| (R- $XH^+$ ) $MnBr_3$ <sup>c)</sup>                       | 1D        | 0.0137            | 0.023            | Chiral organic cation                                     | 9    |
| (S- $XH^+$ ) $MnBr_3$                                     | 1D        | 0.0105            | 0.0227           | Chiral organic cation                                     | 9    |
| (R- $YH^+$ ) $MnBr_3$ <sup>d)</sup>                       | 1D        | 0.0072            | 0.0191           | Chiral organic cation                                     | 9    |
| (S- $YH^+$ ) $MnBr_3$                                     | 1D        | 0.0117            | 0.0159           | Chiral organic cation                                     | 9    |
| (R-DMPZ) $PbBr$ <sup>e)</sup>                             | 1D        | 0.0000<br>46      | 0.021            | Chiral organic cation                                     | 10   |
| (S-DMPZ) $PbBr_4$                                         | 1D        | 0.0003<br>5       | 0.0232           | Chiral organic cation                                     | 10   |
| (D-TBP) $MnCl_3$ <sup>f)</sup>                            | 1D        | -                 | 0.0061           | Chiral organic cation                                     | 11   |
| (L-TBP) $MnCl_3$                                          | 1D        | -                 | 0.0061           | Chiral organic cation                                     | 11   |
| (R- $C_6H_{16}N_2$ ) $PbBr$                               | 2D        | -                 | 0.002            | Chiral organic cation                                     | 12   |
| (S-<br>$C_6H_{16}N_2$ ) $PbBr_4$                          | 2D        | -                 | 0.002            | Chiral organic cation                                     | 12   |
| (R-<br>$BrMBA$ ) $_2PbI_4$ <sup>g)</sup>                  | 2D        | -                 | 0.002            | Chiral organic cation                                     | 13   |
| (R-FMBA) $_2PbI_4$ <sup>h)</sup>                          | 2D        | -                 | 0.0003           | Chiral organic cation                                     | 13   |
| [(S/R)-MBABr] +<br>$PbBr_2$ + (FABr) <sup>i)</sup>        | Thin film | 0.004             | 0.004            | Chiral organic cation                                     | 14   |
| R-MPEA, S-<br>MPEA perovskite<br>Nanosheets <sup>j)</sup> | 2D        | 0.006             | -                | Intrinsic                                                 | 15   |
| R-Pero-NCs,<br>S-Pero-NCs                                 | -         | 0.0023,<br>0.0024 | 0.0065,<br>0.001 | Molecular chirality of<br>the capping ligands             | 16   |
| PCC,<br>( $MePh_3P$ ) $_2CdCl_4$                          | 2D        | 0.005             | 0.043            | Intrinsic                                                 | work |

a) BINAP, 2,2-bis(diphenylphosphino)-1,1-binaphthalene; b) R/S-MBA, R- and S-methylbenzylammonium; c) X, 3-quinuclidinol; d) Y, 2-amino-1-propanol; e) DMPZ, cis-2,5-dimethylpiperazine divalent cation; f) TBP, tert-butyl proline; g) BrMBA, (4-bromophenyl)ethan ammonium; h) FMBA, (4-fluorophenyl)ethan ammonium; i) (S/R)-MBABr, (S/R)-(+)- $\alpha$ -methylbenzylammonium bromide; FABr, formamidinium bromide; j) MPEA,  $\beta$ -methylphenethylamine.

## References

1. G. M. Sheldrick, *Acta Cryst.*, 2008, **A64**, 112.
2. O. V. Dolomanov, L. J. Bourhis, R. J. Gildea, J. A. K. Howard, H. Puschmann, *J. Appl. Cryst.* 2009, **42**, 339.
3. L. J. Bourhis, O. V. Dolomanov, R. J. Gildea, J. A. K. Howard, H. Puschmann, H., *Acta Cryst.*, 2015, **A71**, 59.
4. A. L. Spek, *Acta Cryst.*, 2009, **D65**, 148.
5. J. J. Wang, H. T. Zhou, J. N. Yang, L. Z. Feng, J. S. Yao, K. H. Song, M. M. Zhou, S. Jin, G. Zhang, and H. B. Yao, *J. Am. Chem. Soc.* 2021, **143**, 10860.
6. Q. Cao, R. Song, C. C. S. Chan, Z. Wang, P. Y. Wong, K. S. Wong, V. Blum, H. Lu, *Adv. Optical Mater.* 2023, 2203125.
7. P. Liu, W. Chen, Y. Okazaki, Y. Battie, L. Brocard, M. Decossas, E. Pouget, P. M. Buschbaum, B. Kauffmann, S. Pathan, T. Sagawa, and R. Oda, *Nano Lett.* 2020, **20**, 8453.
8. L. Yao, K. H. Xue, H. Tong, C. Chen, G. Niu, W. Yang, and J. Tang, *Cryst. Growth Des.* 2022, **22**, 5552.
9. J. Chen, S. Zhang, X. Pan, R. Li, S. Ye, A. K. Cheetham, L. Mao, *Angew. Chem. Int. Ed.* 2022, **61**, e202205906.
10. C. Y. Chai, Q. K. Zhang, C. Q. Jing, X. B. Han, C. D. Liu, B. D. Liang, C. C. Fan, Z. Chen, X. W. Lei, A. Stroppa, R. O. Agbaoye, G. A. Adebayo, C. F. Zhang, W. Zhang, *Adv. Optical Mater.* 2023, **11**, 2201996.
11. H. L. Xuan, Y. F. Sang, L. J. Xu, D. S. Zheng, C. M. Shi, Z. N. Chen, *Chem. - Eur. J.* 2022, **28**, e202201299.
12. X. H. Zhao, X. Hu, M. E. Sun, X. M. Luo, C. Zhang, G. S. Chen, X. Y. Dong and S. Q. Zang, *J. Mater. Chem. C* 2022, **10**, 3440.
13. J. T. Lin, D. G. Chen, L. S. Yang, T. C. Lin, Y. H. Liu, Y. C. Chao, P. T. Chou, C. W. Chiu, *Angew. Chem., Int. Ed.* 2021, **133**, 21604.
14. L. Tao, H. Zhan, Y. Cheng, C. Qin, L. Wang, *J. Phys. Chem. Lett.* 2023, **14**, 2317.
15. H. Ren, Y. Wu, C. Wang, Y. Yan, *J. Phys. Chem. Lett.* 2021, **12**, 2676.
16. W. Chen, S. Zhang, M. Zhou, T. Zhao, X. Qin, X. Liu, M. Liu, P. Duan, *J. Phys. Chem. Lett.* 2019, **10**, 3290.
